# Supplementary material for: Transcriptional Terminators Allow Leak-Free Chromosomal Integration of Genetic Constructs in Cyanobacteria
Source: Microorganisms. 2019 Aug 16;7(8):263. doi: 10.3390/microorganisms7080263 (PMC6723963; doi:10.3390/microorganisms7080263)
Supplement: Supplementary file 1 [file microorganisms-07-00263-s001.pdf]

# Supplementary Materials:

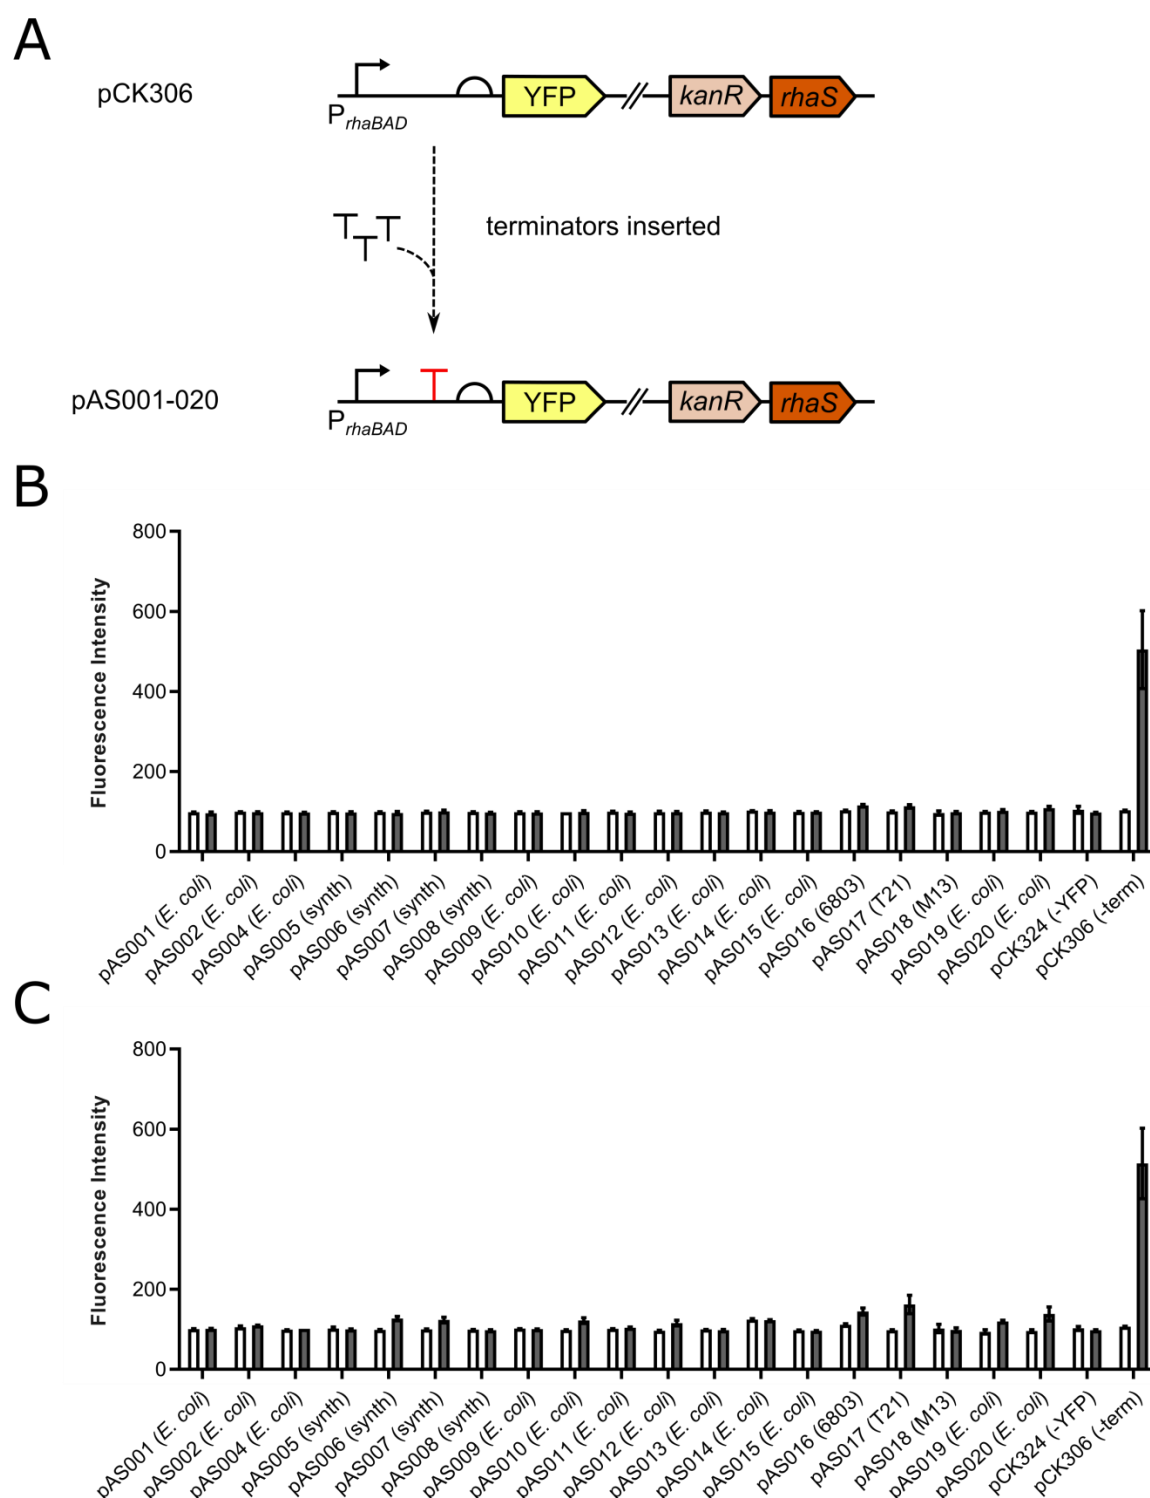

**Figure S1. Efficiency of terminators in *E. coli* strains DH10B and MG1655.** *E. coli* strains (A) DH10B and (B) MG1655 containing plasmids pAS001-002, pAS004-020 (terminator between *rhaBAD* promoter and RBS of YFP-encoding gene) were cultured in LB media supplemented with kanamycin and 0 mg/ml L-rhamnose (white bars) or 0.6 mg/ml L-rhamnose (black bars). Cells containing pCK324 (lacking *rhaBAD* promoter and therefore no YFP) and pCK306 (the parental vector with no terminator and therefore fully inducible with L-rhamnose) were used as controls. The fluorescence intensity of 10,000 cells (arbitrary units) from each culture was measured by flow cytometry after 6 h. Error bars shown are the standard deviation of the mean for three independent biological replicates. Key for SBOL glyphs used in figure: right-angled arrow represents a promoter;

T represents a terminator; semi-circle represents a ribosome-binding site (RBS); coloured blocks represent coding sequences or genes. Origin of each terminator in brackets after plasmid name: *E. coli*, synth (synthetic), 6803 (*Synechocystis* sp. PCC 6803), T21 (bacteriophage T21), M13 (bacteriophage M13).

A

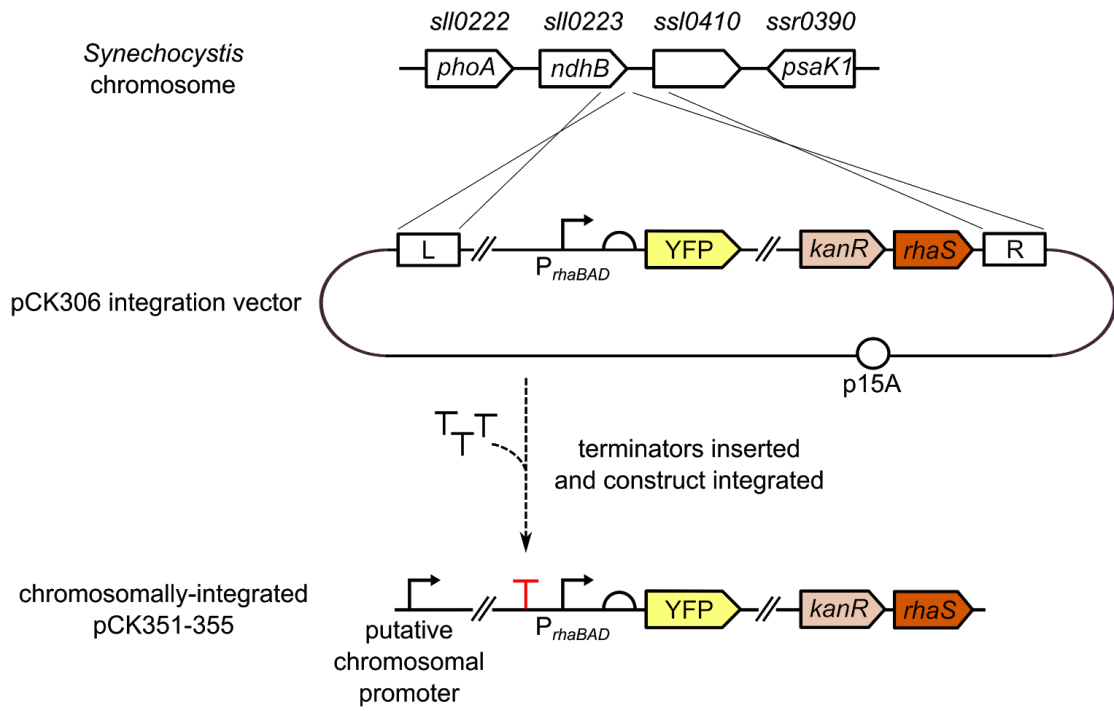

B

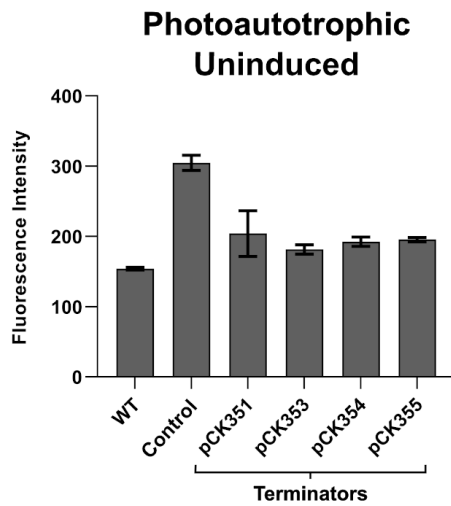

C

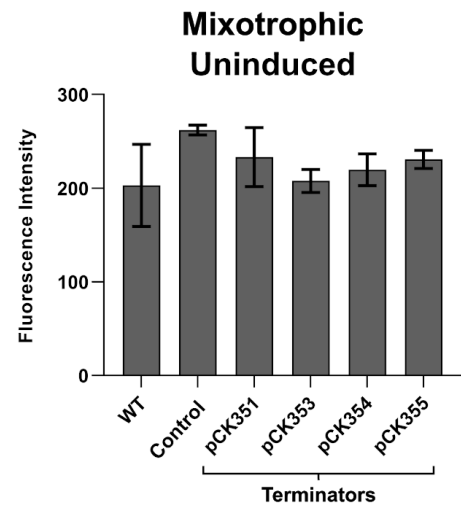

D

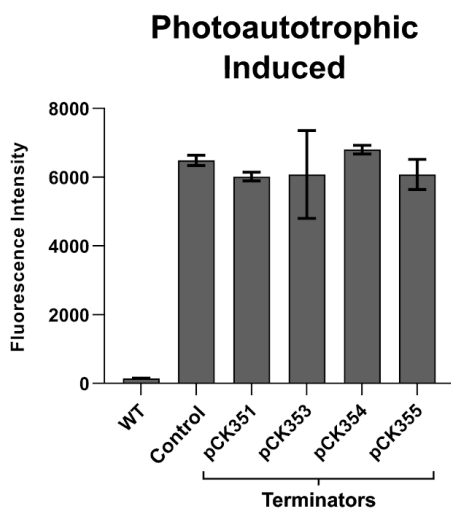

E

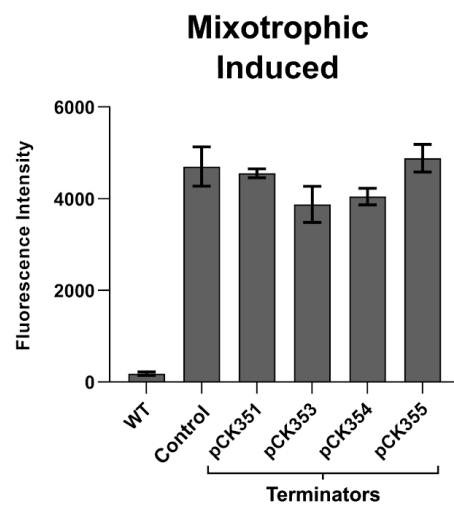

**Figure S2.** The effect of terminator insertion upstream of chromosomally-integrated DNA on transcriptional read-through from chromosomal promoters, at 192 h. (A) Detail showing the insertion of terminators into integration plasmid pCK306 upstream of the *rhaBAD* promoter. The resulting constructs pCK351, pCK353, pCK354 and pCK355 were integrated into the *Synechocystis* genome adjacent to the *ndhB* gene. (B) To test for transcriptional insulation from chromosomal promoters after integration, *Synechocystis* cells containing either pCK351, 353, 354 or 355 (each with one of four terminators inserted upstream of *rhaBAD* promoter) were cultured in BG11 media supplemented with kanamycin and no L-rhamnose, in photoautotrophic conditions and constant light. The fluorescence intensity (arbitrary units) of 10,000 cells measured after 192 h using flow cytometry and compared to wild-type and *Synechocystis* cells lacking YFP entirely and cells containing pCK306 (no terminator, *rhaBAD* promoter, YFP). (C) Equivalent experiment to (B) but strains cultured in BG11 supplemented with 5 mM D-glucose (mixotrophic growth). (D) The same strains of *Synechocystis* were cultured in BG11 media supplemented kanamycin and L-rhamnose to a final concentration of 0.6 mg/ml in photoautotrophic conditions and constant light. The fluorescence intensity (arbitrary units) of 10,000 cells measured after 192 h using flow cytometry and compared to wild-type and *Synechocystis* cells (lacking YFP entirely) and cells containing pCK306 (no terminator, *rhaBAD* promoter, YFP). (E) Equivalent experiment to (D) but strains cultured in BG11 supplemented with 5 mM D-glucose (mixotrophic growth). Error bars shown are the standard deviation of the mean for three independent biological replicates. Key for SBOL glyphs used in figure: right-angled arrow represents a promoter; T represents a terminator; semi-circle represents a ribosome-binding site (RBS); coloured blocks represent coding sequences or genes.

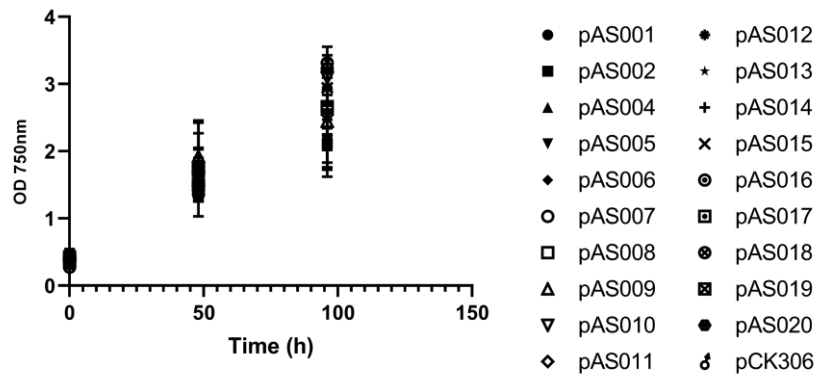

**Figure S3. Growth of *Synechocystis* cells transformed with terminator plasmids, pAS001-pAS020.** *Synechocystis* cells containing integrated terminator constructs from one of pAS001-002, pAS004-020 (terminator between *rhaBAD* promoter and RBS of YFP-encoding gene) or pCK306 (control, no terminator) were cultured in BG11 media supplemented with kanamycin and 0.6 mg/ml L-rhamnose in photoautotrophic conditions and constant light; and the optical density at 750 nm was monitored over time. Error bars represent the standard deviation of the mean for three independent biological replicates.

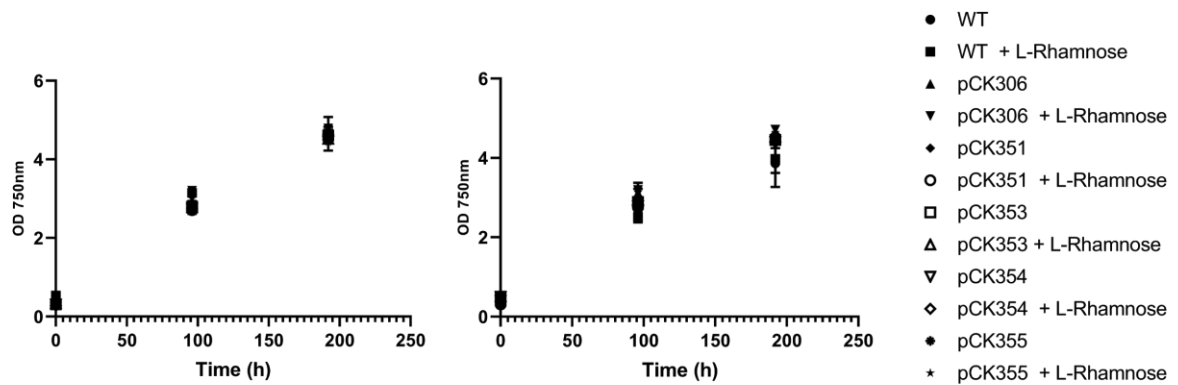

**Figure S4. Growth of *Synechocystis* cells transformed with insulated plasmids pCK351, pCK353, pCK354 or pCK355.** Wild-type (WT) *Synechocystis* cells, or cells containing integrated terminator constructs from one of pCK351, pCK353-355 plasmids (each with one of four Rho-independent terminators inserted upstream of the *rhaBAD* promoter) or pCK306 (control, no terminator) were cultured in BG11 media supplemented with kanamycin and 0 or 0.6 mg/ml L-rhamnose in photoautotrophic conditions and constant light; and the optical density at 750 nm was monitored over time. Error bars represent the standard deviation of the mean for three independent biological replicates.

## Supplementary Materials and Methods

### Plasmid Construction

A table of all plasmids and oligonucleotides (Table S1) is provided. Terminators were introduced as follows. Each terminator sequence was split in two at the hairpin-loop sequence and each part was included at the 5' end of oligonucleotides that were then used to amplify pCK306. PCR fragments were then ligated by blunt-end ligation using the New England Biolabs site-directed mutagenesis kit and sequence verified.

**Table S1.** Plasmids and oligonucleotides used in this study.

| Name       | Details                                                                                                                                                                                                                                                                                                                                                                                                                                                                            |
|------------|------------------------------------------------------------------------------------------------------------------------------------------------------------------------------------------------------------------------------------------------------------------------------------------------------------------------------------------------------------------------------------------------------------------------------------------------------------------------------------|
| pCK306     | Medium copy plasmid (p15A), with 2054 nucleotides of homology to the <i>Synechocystis</i> sp. PCC 6803 chromosome, allowing integration of DNA after the first 34 nucleotides of <i>ssl0410</i> (adjacent to <i>ndhB</i> ), antibiotic resistance gene <i>kanR</i> encoding an aminoglycoside phosphotransferase, the <i>rhaBAD</i> promoter from <i>E. coli</i> , a synthetic RBS and eYFP, the <i>E. coli rhaS</i> RBS and gene inserted downstream of the <i>kanR</i> gene. [1] |
| pAS001-20  | Detailed in Table 1                                                                                                                                                                                                                                                                                                                                                                                                                                                                |
| pCK351     | As pCK306 but with terminator ECK120034435 inserted upstream of <i>rhaBAD</i> promoter                                                                                                                                                                                                                                                                                                                                                                                             |
| pCK353     | As pCK306 but with terminator ECK120015170 inserted upstream of <i>rhaBAD</i> promoter                                                                                                                                                                                                                                                                                                                                                                                             |
| pCK354     | As pCK306 but with terminator ECK120010799 inserted upstream of <i>rhaBAD</i> promoter                                                                                                                                                                                                                                                                                                                                                                                             |
| pCK355     | As pCK306 but with the <i>ilvBN</i> terminator inserted upstream of <i>rhaBAD</i> promoter                                                                                                                                                                                                                                                                                                                                                                                         |
| oligoAS001 | ACTGCAAGGTAGTGGACAAGACCGGCGGTCTTAAGTTTTTTGGCTGAATACGACCAGTC<br>TAAAAAG<br>Used in construction of pAS001                                                                                                                                                                                                                                                                                                                                                                           |
| oligoAS002 | AATGCGGTGGACAGGATCGGCGGTTTTCTTTTCTTCTCAAATGAATCGGGTAAGTTTA<br>TAATATAC<br>Used in construction of pAS001                                                                                                                                                                                                                                                                                                                                                                           |
| oligoAS003 | AGGTGCGGGCTTTTTTCTGTGTTTCCTACGACCAGTCTAAAAAG<br>Used in construction of pAS002                                                                                                                                                                                                                                                                                                                                                                                                     |
| oligoAS004 | GACAGTGC GGGCTTTTTTTTTTCGACCAAAGGATGAATCGGGTAAGTTTATAATATAC<br>Used in construction of pAS002                                                                                                                                                                                                                                                                                                                                                                                      |
| oligoAS007 | TCTGGAATTTGGTACCGAGTACGACCAGTCTAAAAAG<br>Used in construction of pAS004                                                                                                                                                                                                                                                                                                                                                                                                            |
| oligoAS008 | AAAGAGACGCTGAAAAGCGTCTTTTTTCGTTTTGGTCCATGAATCGGGTAAGTTTATAAT<br>ATAC<br>Used in construction of pAS004                                                                                                                                                                                                                                                                                                                                                                             |
| oligoAS009 | TCGGGAGGCCTCTTTTCTGGAATTTGGTACCGAGTACGACCAGTCTAAAAAG<br>Used in construction of pAS005                                                                                                                                                                                                                                                                                                                                                                                             |
| oligoAS010 | AAGGGGGGCCTTTTTTCGTTTTGGTCCATGAATCGGGTAAGTTTATAATATAC<br>Used in construction of pAS005                                                                                                                                                                                                                                                                                                                                                                                            |
| oligoAS011 | TCAGCGTCTTTTTTCGAAAATTTGGTACCGAGTACGACCAGTCTAAAAAG<br>Used in construction of pAS006                                                                                                                                                                                                                                                                                                                                                                                               |

|            |                                                                                                                                                                      |
|------------|----------------------------------------------------------------------------------------------------------------------------------------------------------------------|
| oligoAS012 | AAAGCGTCTTTTTTCGTTTTTGGTCCATGAATCGGGTAAGTTTATAATATAC<br>Used in construction of pAS006                                                                               |
| oligoAS013 | TCAGCGTCTTTTTTTTTTTTTTTGGTACCGAGTACGACCAGTCTAAAAAG<br>Used in construction of pAS007                                                                                 |
| oligoAS014 | AAAGCGTCTTTTTTCGTTTTTGGTCCATGAATCGGGTAAGTTTATAATATAC<br>Used in construction of pAS007                                                                               |
| oligoAS015 | TTTGGGAGGCCTTTTTTCGAAAATACGACCAGTCTAAAAAG<br>Used in construction of pAS008                                                                                          |
| oligoAS016 | TCGGGGGGCCTTTTTTATTGATAACAAAAATGAATCGGGTAAGTTTATAATATAC<br>Used in construction of pAS008                                                                            |
| oligoAS017 | TCGACTGAGCCTTTCGTTTTATTTGATGCCTGGTACGACCAGTCTAAAAAG<br>Used in construction of pAS009                                                                                |
| oligoAS018 | AAGACTGGGCCTTTCGTTTTATCTGTTGTTTGTCTGGTGAACGCTCTCTACTAGAGTCACAC<br>TGGCTCACCTTCGGGTGGGCCTTTCGCGTTTATAATGAATCGGGTAAGTTTATAATATA<br>C<br>Used in construction of pAS009 |
| oligoAS019 | TCAGTCGCCTTAAAAATCAGTTACGACCAGTCTAAAAAG<br>Used in construction of pAS010                                                                                            |
| oligoAS020 | TGAGTCGCCTTTTTTTGTCTATGAATCGGGTAAGTTTATAATATAC<br>Used in construction of pAS010                                                                                     |
| oligoAS021 | AGCGGCCTTTTATAGTTAGATCTACGACCAGTCTAAAAAG<br>Used in construction of pAS011                                                                                           |
| oligoAS022 | CTGCGGCCTTTTTCTTTTCACTATGAATCGGGTAAGTTTATAATATAC<br>Used in construction of pAS011                                                                                   |
| oligoAS023 | AAGCGGGTTTTTTCGAAAATTGTTACGACCAGTCTAAAAAG<br>Used in construction of pAS012                                                                                          |
| oligoAS024 | CGGCGGGTTTTTTATAGCTAAAAATGAATCGGGTAAGTTTATAATATAC<br>Used in construction of pAS012                                                                                  |
| oligoAS025 | ATCTTCCGGGGGCTTTCATGCGTTTACGACCAGTCTAAAAAG<br>Used in construction of pAS013                                                                                         |
| oligoAS026 | CACCTTCCGGGGGCTTTTTTATTGCGCATGAATCGGGTAAGTTTATAATATAC<br>Used in construction of pAS013                                                                              |
| oligoAS027 | ACTCTGTCGCCTTTTTTCCTGACTCATAACTACGACCAGTCTAAAAAG<br>Used in construction of pAS014                                                                                   |
| oligoAS028 | AATCTGTCGCCTTTTTCTTTGCTTGCTTTATGAATCGGGTAAGTTTATAATATAC<br>Used in construction of pAS014                                                                            |
| oligoAS029 | TTCGACTGAGCCTTTCGTTTTATTTGATGCCTGGTACGACCAGTCTAAAAAG<br>Used in construction of pAS015                                                                               |
| oligoAS030 | AGACTGGGCCTTTCGTTTTATCTGTTGTTTGTCTGGTGAACGCTCTCATGAATCGGGTAAGT<br>TTATAATATAC<br>Used in construction of pAS015                                                      |
| oligoAS031 | AAACCTCCCTGGGATTTTATGAGAAAAGTGGTAGTCGGTCTACTAAACCTACGACCAGT                                                                                                          |

|            |                                                                                                                |
|------------|----------------------------------------------------------------------------------------------------------------|
|            | CTAAAAAG<br>Used in construction of pAS016                                                                     |
| oligoAS032 | CGGCCTCCCTTTTTTCACTTGCTAAGCTCTCTTCGTTTATGAATCGGGTAAGTTTATAAT<br>ATAC<br>Used in construction of pAS016         |
| oligoAS033 | AGAGTCACTAACGGCAGCTTATGCGAATAGTGTTGCTACTTGCTCAATTACGACCAGTCT<br>AAAAAG<br>Used in construction of pAS017       |
| oligoAS034 | TAAGTTGCAACGGTGGCTTTTTTATATGAATCGGGTAAGTTTATAATATAC<br>Used in construction of pAS017                          |
| oligoAS035 | AAGGAGCCTTTAATTGTATCGGTTTATCAGCTTGCTTTACGACCAGTCTAAAAAG<br>Used in construction of pAS018                      |
| oligoAS036 | TTGGAGCCTTTTTTTTGGAGATTTTCAACATGAAAAAATTATTATTATGAATCGGGTAA<br>GTTTATAATATAC<br>Used in construction of pAS018 |
| oligoAS037 | TCGGTGCGGGGTCTTTACGACCAGTCTAAAAAG<br>Used in construction of pAS019                                            |
| oligoAS038 | AAGGTCCGGGGTTTTTTTTATGAATCGGGTAAGTTTATAATATAC<br>Used in construction of pAS019                                |
| oligoAS039 | AAGCGGGTTTTTACGTATACGACCAGTCTAAAAAG<br>Used in construction of pAS020                                          |
| oligoAS040 | CGGCGGGTTTTACTTTATGAATCGGGTAAGTTTATAATATAC<br>Used in construction of pAS020                                   |

---

### Supplementary References

1. Kelly, C.L.; Taylor, G.M.; Hitchcock, A.; Torres-Méndez, A.; Heap, J.T. A Rhamnose-Inducible System for Precise and Temporal Control of Gene Expression in Cyanobacteria. *ACS Synth. Biol.* **2018**, *7*, 1056–1066.
